# Supplementary material for: A NIR phosphor with ultra-broadband emission enabled by dual energy transfer within two Cr3+ emitters and Cr3+ → Yb3+
Source: Royal Society of Chemistry journal article supplement (doi:10.1039/d4tc00461b), 2024-01-01
Supplement: d4tc00461b1.pdf [file d4tc00461b1.pdf]

## Supporting information

### **A NIR phosphor with Ultra-broadband emission enabled by dual Energy transfer within two Cr<sup>3+</sup> emitters and Cr<sup>3+</sup> → Yb<sup>3+</sup>**

Shuai Wei, <sup>a, b</sup> Zeyu Lyu, <sup>a\*</sup> Dashuai Sun, <sup>a</sup> Sida Shen, <sup>a</sup> Xiaowei Zhang, <sup>a</sup> Zheng Lu, <sup>a</sup> Pengcheng Luo,

<sup>a</sup> Hanyu Hu, <sup>a</sup> Hongpeng You <sup>a, b\*</sup>

<sup>a</sup> Key Laboratory of Rare Earths, Chinese Academy of Sciences; Ganjiang Innovation  
Academy, Chinese Academy of Sciences, Ganzhou 341000, P. R. China

<sup>b</sup> School of Chemistry and Chemical Engineering, Nanchang University, Nanchang  
330031, P. R. China

\* Corresponding author. Fax: +86 431 85698041. E-mail address: hpyou@ciac.ac.cn

(H.P. You), zylyu@gia.cas.cn (Z.Y. Lyu).

### Supplementary Notes:

The PL decay curves were fitted using bi ( $n = 2$ ) exponential functions:

$$I = \sum_{i=1}^n I_0 \exp\left(-\frac{t}{\tau}\right)$$

where  $I$  represent luminescence intensity,  $t$  denotes lifetime, and  $\tau$  refers to decay time for different components. The PL average lifetime  $\tau$  can be calculated by the following formula:

$$\tau = \frac{A_1\tau_1^2 + A_2\tau_2^2}{A_1\tau_1 + A_2\tau_2}$$

where  $A_1$  and  $A_2$  are the corresponding fitting constants;  $\tau_1$  and  $\tau_2$  are the decay time for different components. With the increase of  $\text{Cr}^{3+}$  dopant concentration, the fluorescence decay time gradually decreases from 200.72 ns to 16.00 ns, proving that energy transfer occurs between  $\text{Cr}^{3+}$  ions.

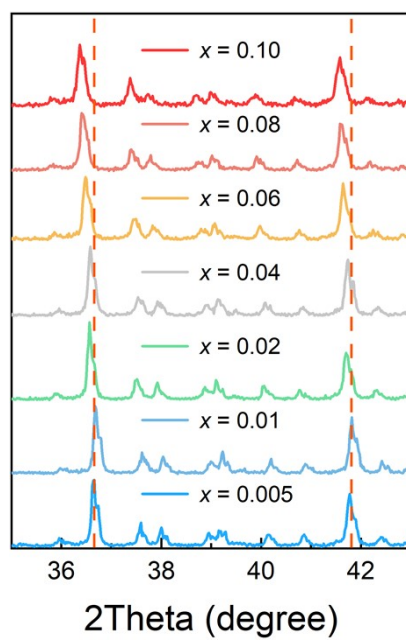

**Figure S1.** Enlarged XRD patterns of the SSAO:xCr<sup>3+</sup> (x = 0.005 - 0.10) samples (35°-43°).

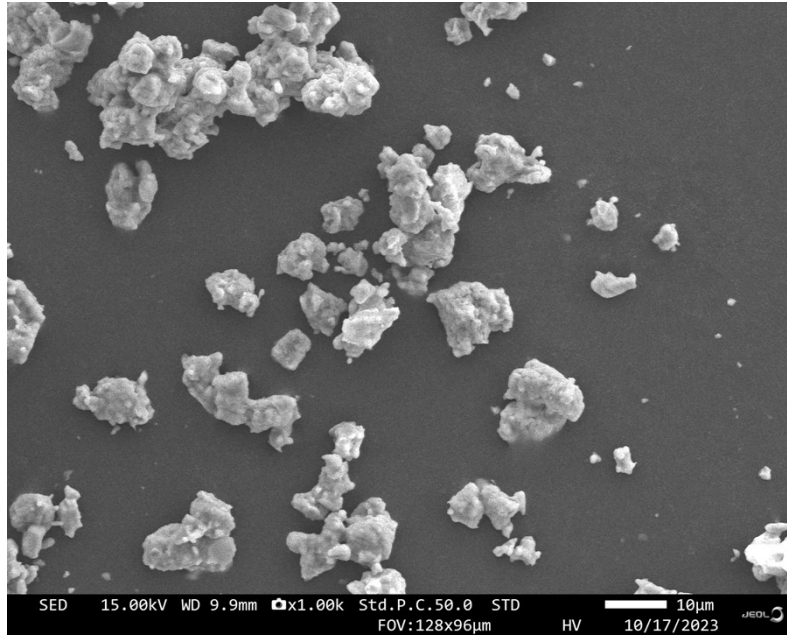

**Figure S2.** SEM image of SSAO:0.02Cr<sup>3+</sup>,0.01Yb<sup>3+</sup> phosphor.

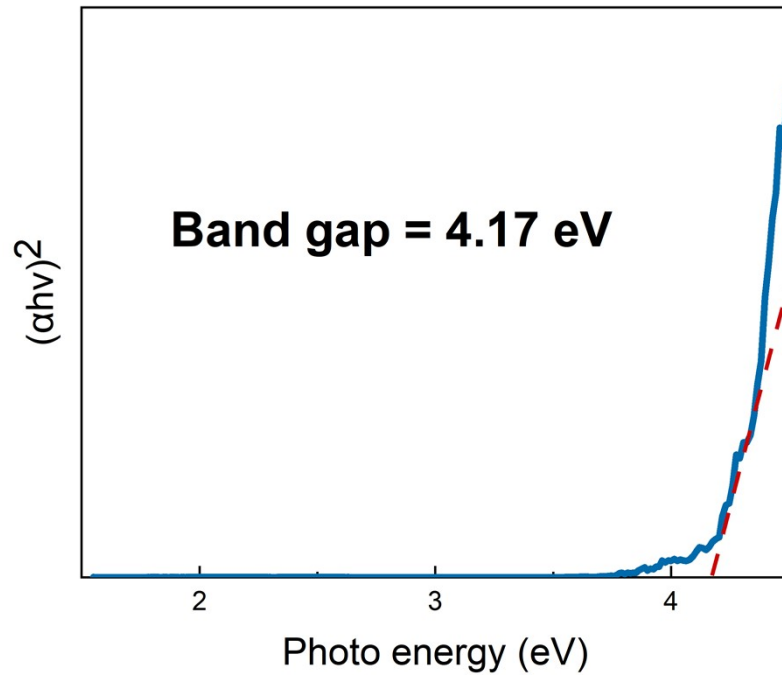

**Figure S3.** the plot of  $(\alpha h\nu)^2$  vs photon energy  $h\nu$  for SSAO.

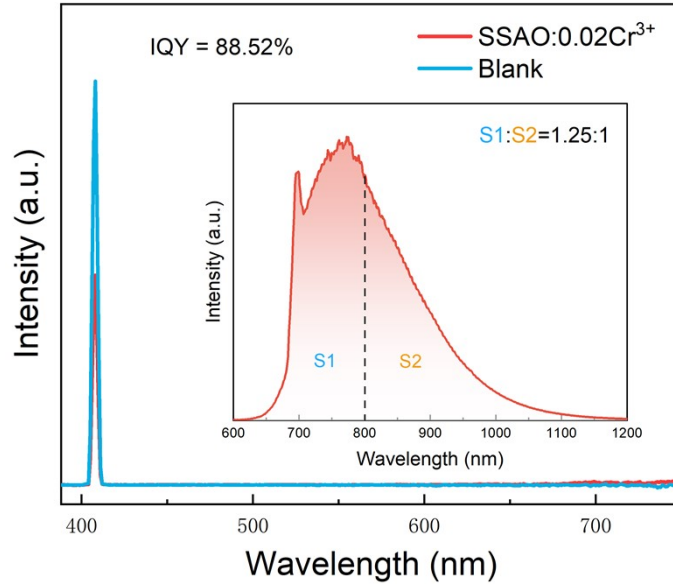

**Fig S4.** IQY of SSAO:0.02Cr<sup>3+</sup> phosphor.

The absorption efficiency ( $\xi_{abs}$ ), internal quantum efficiency (IQE), and external quantum efficiency (EQE) can be respectively calculated by the following formula:

$$\xi_{abs} = \frac{\int E_R - \int E_s}{\int E_R}$$

$$IQE = \frac{\int L_s}{\int E_R - \int E_s}$$

$$EQE = IQE \times \xi_{abs}$$

where  $\int L_s$  represents the integral area of emission spectrum,  $\int E_R$  and  $\int E_s$  represent the integral area of excitation spectrum without and with the phosphor in the integrating sphere, respectively. As shown in the Figure S4, S1 and S2 area ratio of approximately 1.25:1, the values of IQE,  $\xi_{abs}$  and EQE of and SSAO:0.02Cr<sup>3+</sup> are calculated to be 88.52%, 48.14% and 42.61% under 408 nm excitation, respectively.

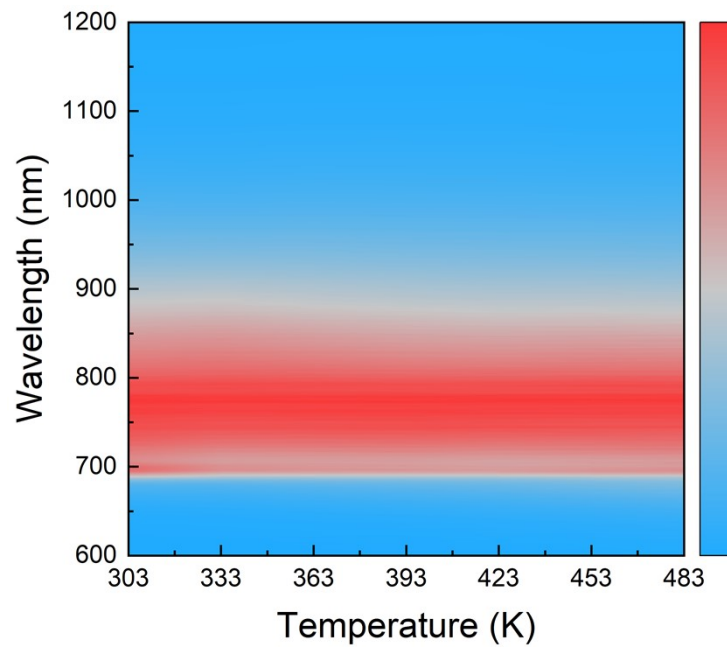

**Fig S5.** Normalized emission spectra as a function of temperature.

**Table S1.** Refined structural data of SSAO samples.

| Samples                                             | Cell parameters (Å) |           |          | Volume<br>(Å <sup>3</sup> ) | R <sub>wp</sub> , R <sub>p</sub> , (%),<br>$\chi^2$ |
|-----------------------------------------------------|---------------------|-----------|----------|-----------------------------|-----------------------------------------------------|
|                                                     | a                   | b         | c        |                             |                                                     |
| SSAO                                                | 15.149682           | 11.194379 | 4.906047 | 790.752                     | 8.245, 5.82,<br>1.854                               |
| SSAO:0.02Cr <sup>3+</sup>                           | 15.160907           | 11.200595 | 4.911974 | 792.63                      | 8.04, 5.63,<br>1.823                                |
| SSAO:0.02Cr <sup>3+</sup> ,<br>0.01Yb <sup>3+</sup> | 15.155392           | 11.201921 | 4.912127 | 792.494                     | 8.4, 5.925,<br>1.847                                |
